# Supplementary material for: Titanium(IV) Oxo-Complex with Acetylsalicylic Acid Ligand and Its Polymer Composites: Synthesis, Structure, Spectroscopic Characterization, and Photocatalytic Activity
Source: MDPI journal article supplement (doi:10.3390/ma15134408), 2022-06-22
Supplement: s1 [file s1]

**Table S1.** Selected bond lengths [Å] and bond angles [°] of [Ti<sub>4</sub>O<sub>4</sub>(O<sup>i</sup>Bu)<sub>10</sub>(asp)<sub>2</sub>] $\cdot$ H<sub>2</sub>O (**1**).

| Bond Lengths      |            |                     |            |
|-------------------|------------|---------------------|------------|
| Ti1-O71           | 1.785(2)   | Ti3-O101            | 1.793(2)   |
| Ti1-O6            | 1.840(2)   | Ti3-O6              | 1.835(2)   |
| Ti1-O61           | 1.971(2)   | Ti3-O41             | 1.967(2)   |
| Ti1-O31           | 2.014(2)   | Ti3-O51             | 2.028(2)   |
| Ti1-O5            | 2.0485(19) | Ti3-O5              | 2.053(2)   |
| Ti1-O1            | 2.160(2)   | Ti3-O12             | 2.158(2)   |
| Ti2-O91           | 1.797(3)   | Ti4-O121            | 1.787(2)   |
| Ti2-O81           | 1.800(3)   | Ti4-O111            | 1.821(2)   |
| Ti2-O31           | 2.011(2)   | Ti4-O51             | 2.008(2)   |
| Ti2-O11           | 2.041(2)   | Ti4-O2              | 2.039(2)   |
| Ti2-O5            | 2.0561(19) | Ti4-O5              | 2.070(2)   |
| Ti2-O41           | 2.104(2)   | Ti4-O61             | 2.078(2)   |
| Ti1-Ti3           | 2.9608(9)  | Ti3-Ti4             | 3.1883(12) |
| Ti1-Ti4           | 3.1445(9)  | Ti2-Ti3             | 3.1387(9)  |
| Ti1-Ti2           | 3.1870(9)  | Ti2-Ti4             | 3.9780(11) |
| Bond angles       |            |                     |            |
| O(71)-Ti(1)-O(6)  | 100.39(10) | O(101)-Ti(3)-O(6)   | 99.51(10)  |
| O(71)-Ti(1)-O(61) | 102.87(10) | O(101)-Ti(3)-O(41)  | 102.95(10) |
| O(6)-Ti(1)-O(61)  | 93.51(10)  | O(6)-Ti(3)-O(41)    | 93.48(9)   |
| O(71)-Ti(1)-O(31) | 99.89(10)  | O(101)-Ti(3)-O(51)  | 99.13(10)  |
| O(6)-Ti(1)-O(31)  | 98.33(10)  | O(6)-Ti(3)-O(51)    | 99.65(10)  |
| O(61)-Ti(1)-O(31) | 151.94(9)  | O(41)-Ti(3)-O(51)   | 152.02(9)  |
| O(71)-Ti(1)-O(5)  | 176.65(10) | O(101)-Ti(3)-O(5)   | 176.07(10) |
| O(6)-Ti(1)-O(5)   | 80.13(9)   | O(6)-Ti(3)-O(5)     | 80.12(9)   |
| O(61)-Ti(1)-O(5)  | 80.37(8)   | O(41)-Ti(3)-O(5)    | 80.98(8)   |
| O(31)-Ti(1)-O(5)  | 76.76(8)   | O(51)-Ti(3)-O(5)    | 77.12(8)   |
| O(71)-Ti(1)-O(1)  | 94.11(10)  | O(101)-Ti(3)-O(12)  | 93.90(10)  |
| O(6)-Ti(1)-O(1)   | 165.19(9)  | O(6)-Ti(3)-O(12)    | 166.14(9)  |
| O(61)-Ti(1)-O(1)  | 80.26(9)   | O(41)-Ti(3)-O(12)   | 80.04(8)   |
| O(31)-Ti(1)-O(1)  | 81.96(9)   | O(51)-Ti(3)-O(12)   | 81.52(9)   |
| O(5)-Ti(1)-O(1)   | 85.56(8)   | O(5)-Ti(3)-O(12)    | 86.74(8)   |
| O(91)-Ti(2)-O(81) | 97.45(14)  | O(121)-Ti(4)-O(111) | 96.64(12)  |
| O(91)-Ti(2)-O(31) | 98.17(10)  | O(121)-Ti(4)-O(51)  | 100.68(11) |
| O(81)-Ti(2)-O(31) | 97.44(10)  | O(111)-Ti(4)-O(51)  | 97.55(10)  |
| O(91)-Ti(2)-O(11) | 91.20(10)  | O(121)-Ti(4)-O(2)   | 87.87(10)  |
| O(81)-Ti(2)-O(11) | 97.50(10)  | O(111)-Ti(4)-O(2)   | 96.69(10)  |
| O(31)-Ti(2)-O(11) | 161.16(8)  | O(51)-Ti(4)-O(2)    | 162.40(9)  |
| O(91)-Ti(2)-O(5)  | 95.55(11)  | O(121)-Ti(4)-O(5)   | 96.38(10)  |
| O(81)-Ti(2)-O(5)  | 166.39(12) | O(111)-Ti(4)-O(5)   | 166.67(10) |
| O(31)-Ti(2)-O(5)  | 76.65(8)   | O(51)-Ti(4)-O(5)    | 77.18(8)   |
| O(11)-Ti(2)-O(5)  | 86.24(8)   | O(2)-Ti(4)-O(5)     | 86.66(8)   |
| O(91)-Ti(2)-O(41) | 171.09(10) | O(121)-Ti(4)-O(61)  | 168.90(10) |
| O(81)-Ti(2)-O(41) | 89.72(12)  | O(111)-Ti(4)-O(61)  | 90.17(11)  |
| O(31)-Ti(2)-O(41) | 86.09(9)   | O(51)-Ti(4)-O(61)   | 87.05(9)   |
| O(11)-Ti(2)-O(41) | 82.57(8)   | O(2)-Ti(4)-O(61)    | 82.62(9)   |
| O(5)-Ti(2)-O(41)  | 77.75(8)   | O(5)-Ti(4)-O(61)    | 77.43(8)   |
| Ti(1)-O(5)-Ti(4)  | 99.56(8)   | Ti(1)-O(5)-Ti(3)    | 92.41(8)   |
| Ti(3)-O(5)-Ti(4)  | 101.30(8)  | Ti(1)-O(5)-Ti(2)    | 101.87(8)  |

|                   |            |                   |            |
|-------------------|------------|-------------------|------------|
| Ti(2)-O(5)-Ti(4)  | 149.23(10) | Ti(3)-O(5)-Ti(2)  | 99.60(9)   |
| Ti(3)-O(6)-Ti(1)  | 107.33(11) |                   |            |
| Ti(3)-Ti(1)-Ti(4) | 62.88(3)   | Ti(1)-Ti(4)-Ti(3) | 55.744(18) |
| Ti(3)-Ti(2)-Ti(1) | 55.81(2)   | Ti(1)-Ti(3)-Ti(2) | 62.92(2)   |
| Ti(3)-Ti(1)-Ti(2) | 61.27(2)   | Ti(1)-Ti(3)-Ti(4) | 61.38(2)   |
| Ti(4)-Ti(1)-Ti(2) | 77.85(3)   | Ti(2)-Ti(3)-Ti(4) | 77.91(2)   |

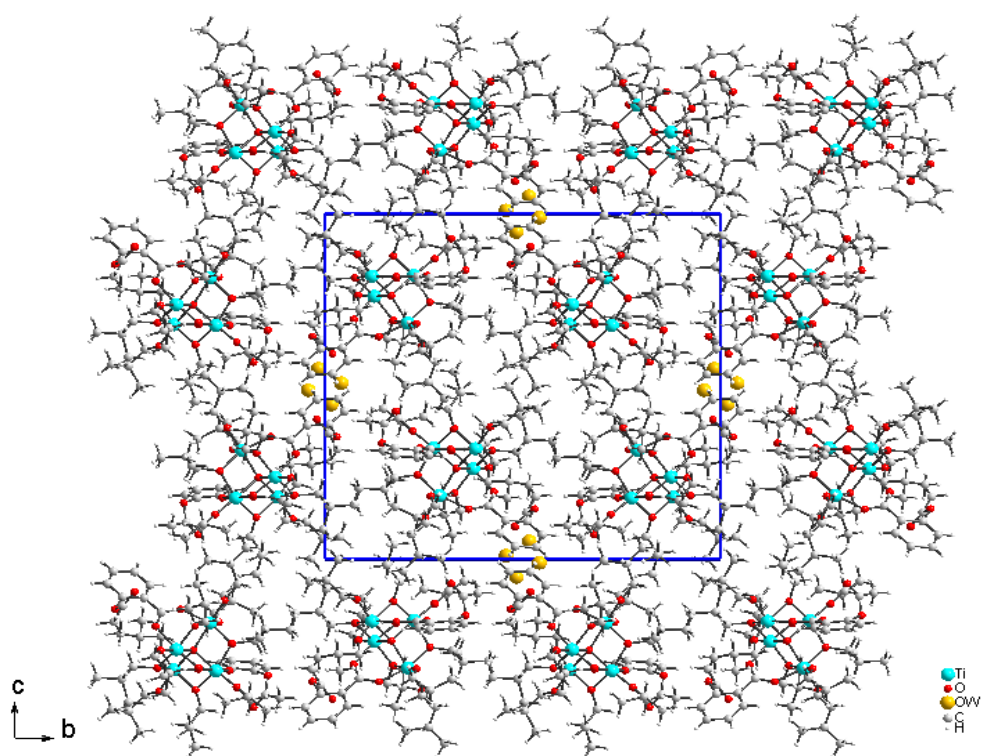

**Figure S1.** The crystal network of (1) along a axis shows densely packed titanium clusters. Water molecules (OW) are marked in orange and circled.

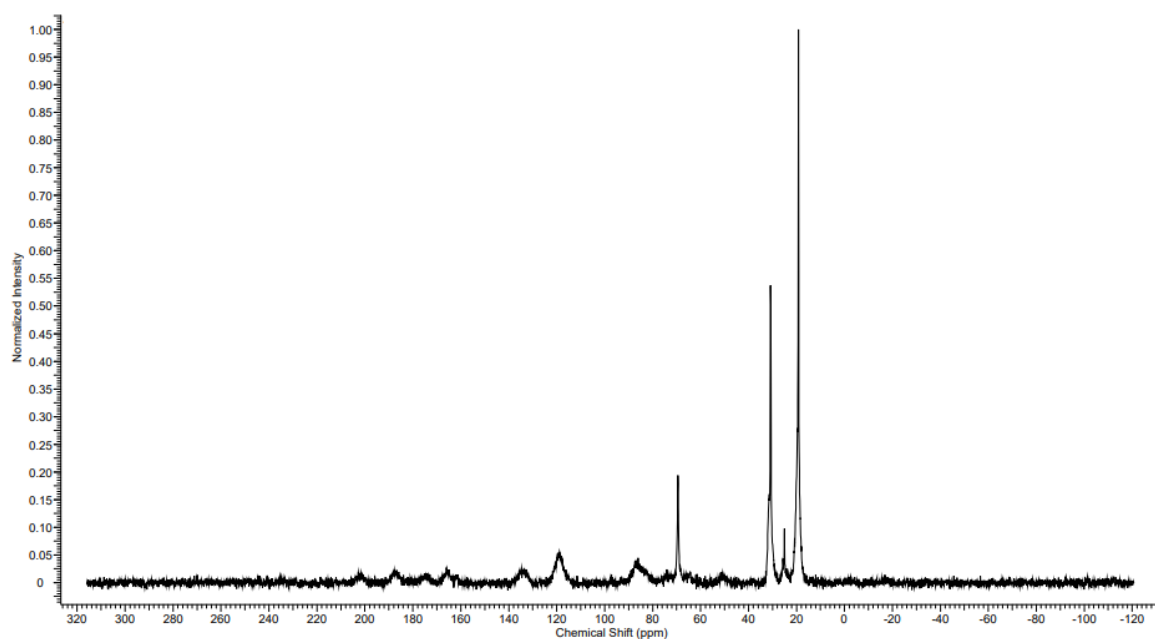

**Figure S2.**  $^{13}\text{C}$  NMR spectrum of (1) in the solid phase.

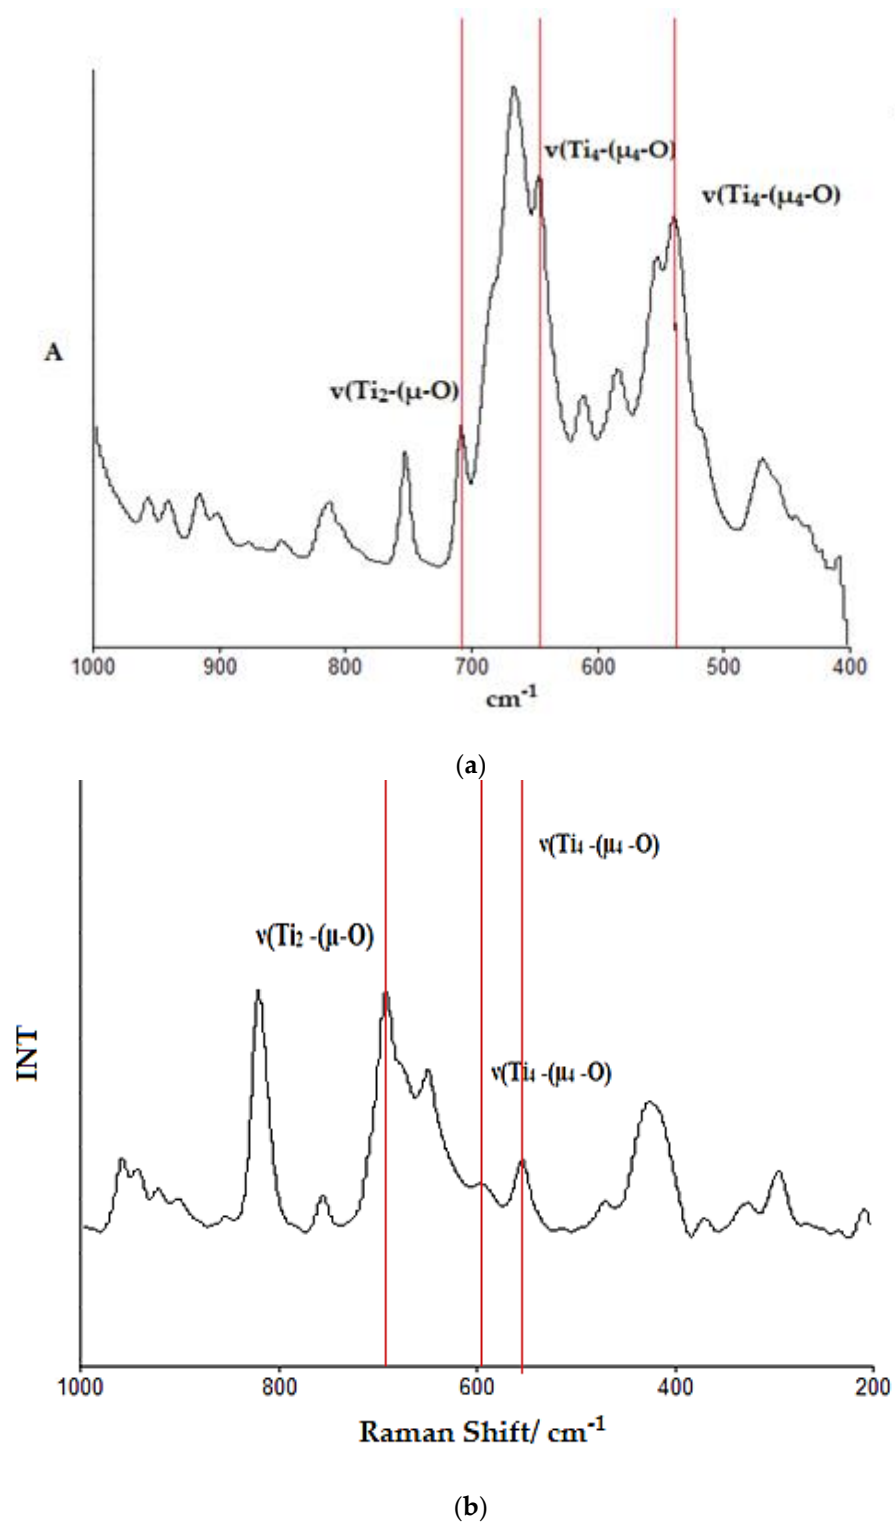

Figure S3. The IR (a) and Raman (b) spectra of the complex (1).

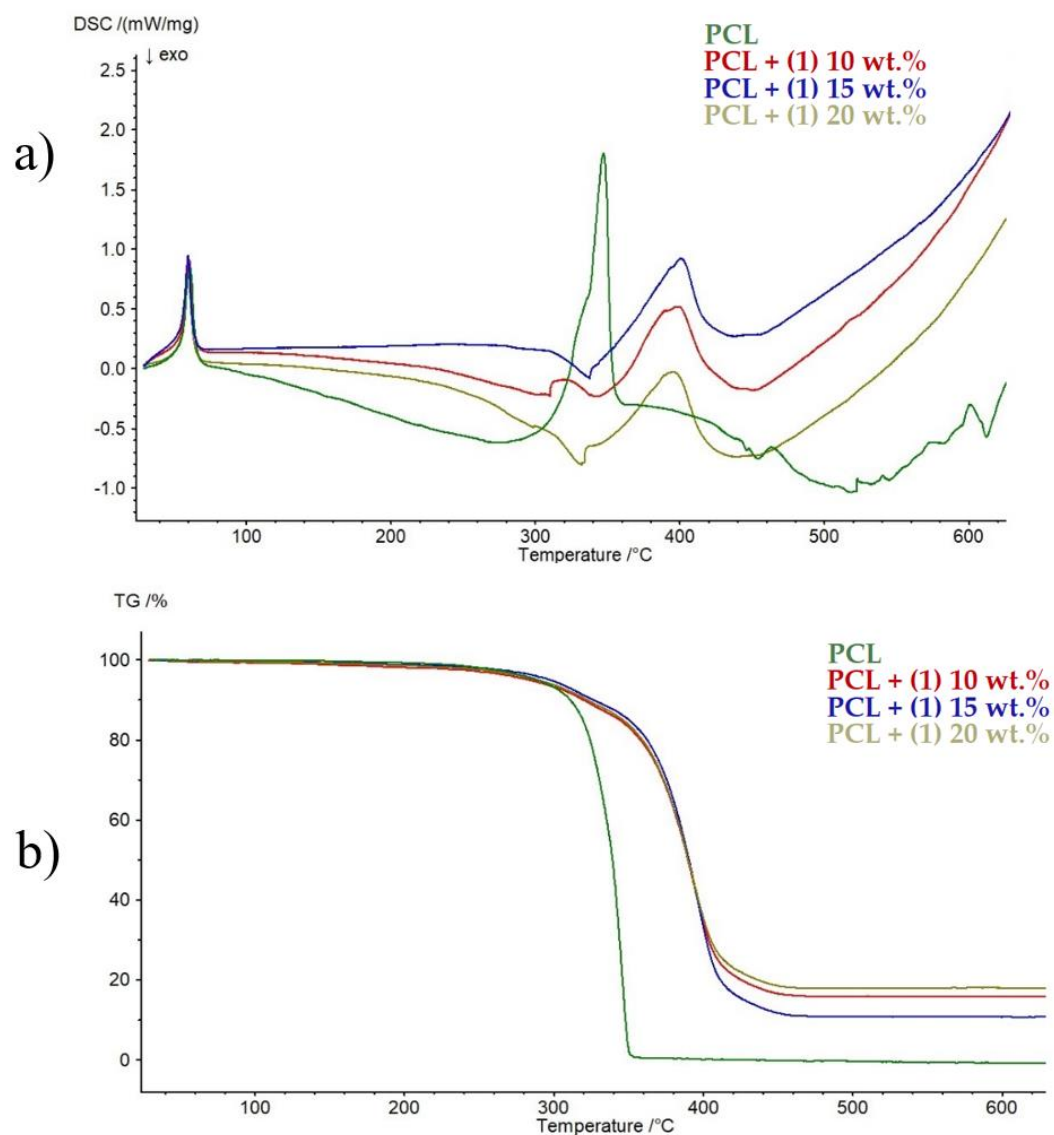

**Figure S4.** Differential scanning calorimetry curves (DSC) (a) and thermogravimetric curves (TG) and (b) of the produced composite materials and PCL.

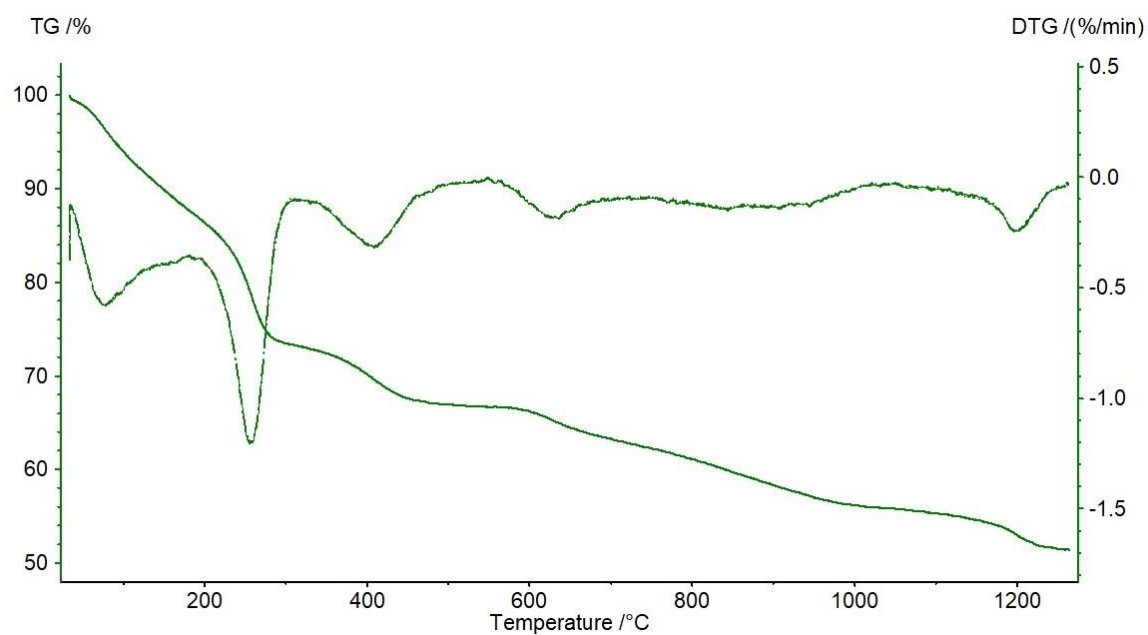

**Figure S5.** Thermogravimetric (TG) and derivative thermogravimetric (DTG) curves registered for (1) between 20 and 1300 °C.

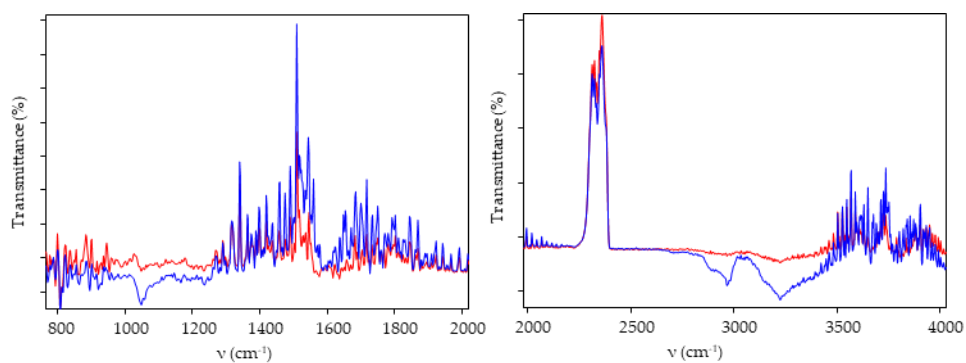

**Figure S6.** IR spectra of the volatile thermolysis products of (1), registered in the range 35–150 °C (red line—35 °C, blue line—150 °C).

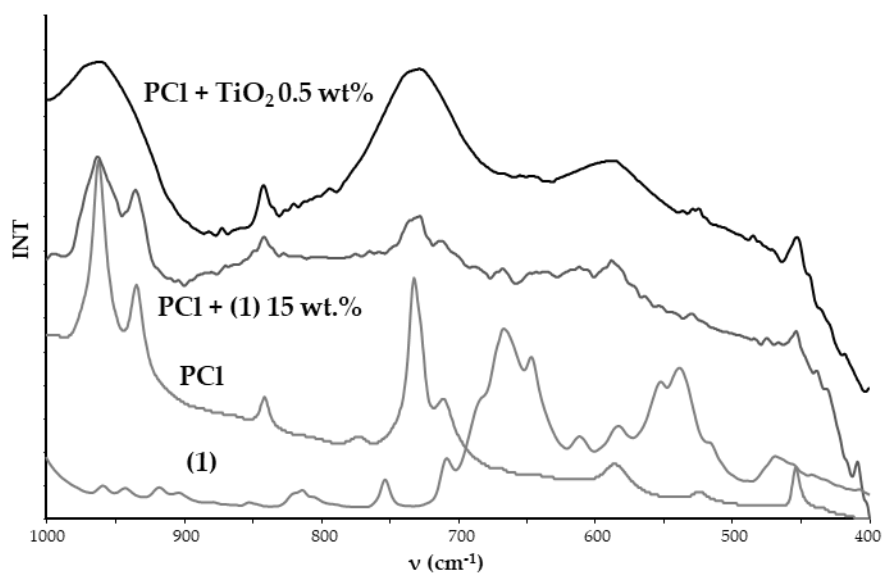

**Figure S7.** IR spectra of PCL + TiO<sub>2</sub> 0.5 wt.%, PCL + (1) 15 wt.% samples, PCL, and (1).

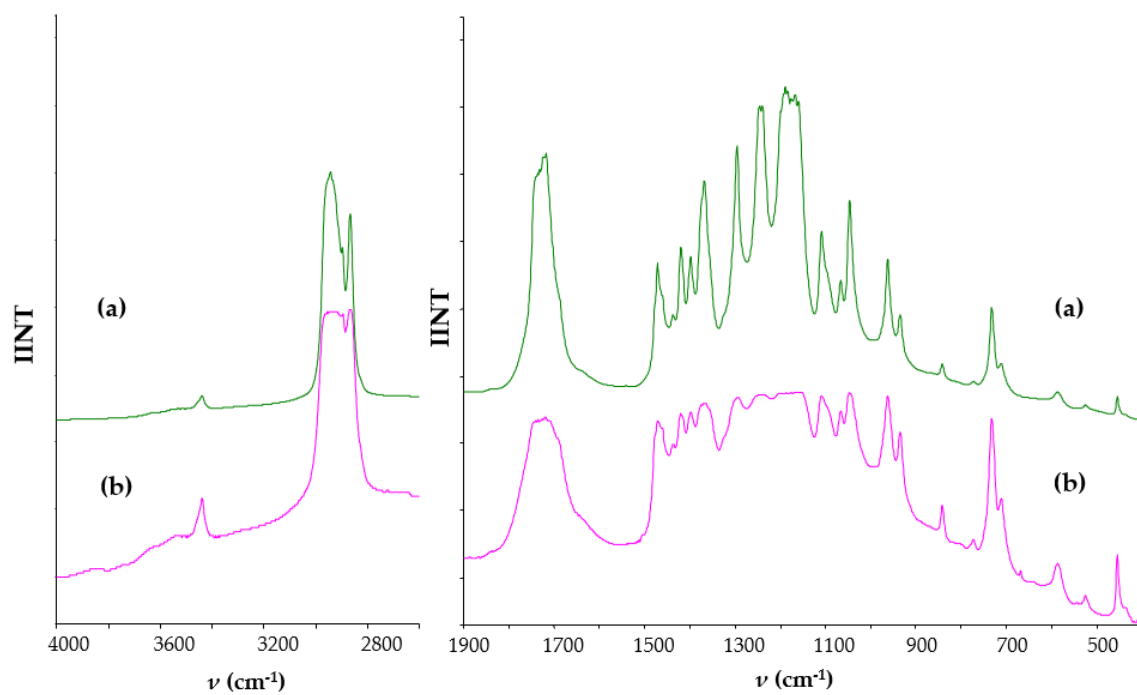

**Figure S8.** IR spectra of PCL before (a) and after (b) photocatalytic process. .
